# Supplementary material for: Serum metabolite profiles as potential biochemical markers in young adults with community-acquired pneumonia cured by moxifloxacin therapy
Source: PubMed Central journal article supplement (PMC7064523; doi:10.1038/s41598-020-61290-x), 2020-03-10

## Supplementary Information

Serum metabolite profiles as potential biochemical markers in young adults with community acquired pneumonia cured by moxifloxacin therapy.

Bo Zhou<sup>1</sup>, Bowen Lou<sup>2,4</sup>, Junhui Liu<sup>3#</sup>, Jianqing She<sup>2,4#</sup>

<sup>1</sup>Respiratory and critical care medicine, First Affiliated Hospital of Medical College, Xi'an Jiaotong University, Xi'an, 710048

<sup>2</sup>Cardiology Department, First Affiliated Hospital of Medical College, Xi'an Jiaotong University, Xi'an, 710048

<sup>3</sup> Diagnostic Department, First Affiliated Hospital of Medical College, Xi'an Jiaotong University, Xi'an, 710048

<sup>4</sup> Key Laboratory of Environment and Genes Related to Diseases, Ministry of Education, Xi'an 710048

\*To whom correspondence should be addressed:

Jianqing She, E-mail: [jianqingshe@xjtu.edu.cn](mailto:jianqingshe@xjtu.edu.cn),

Junhui Liu, E-mail: [liu1109@xjtu.edu.cn](mailto:liu1109@xjtu.edu.cn);

Supplementary Figure1: Data normalization.

A.

Before Normalization

After Normalization

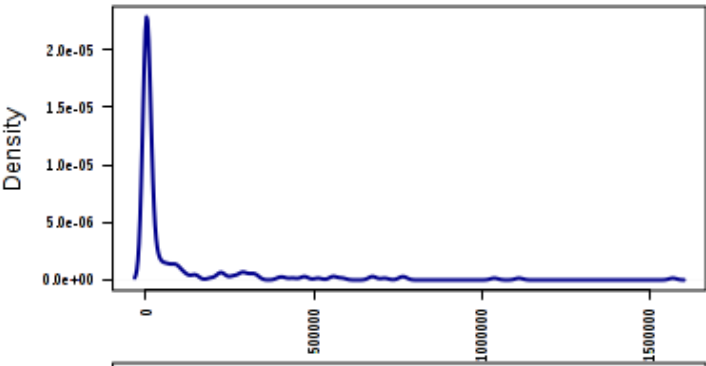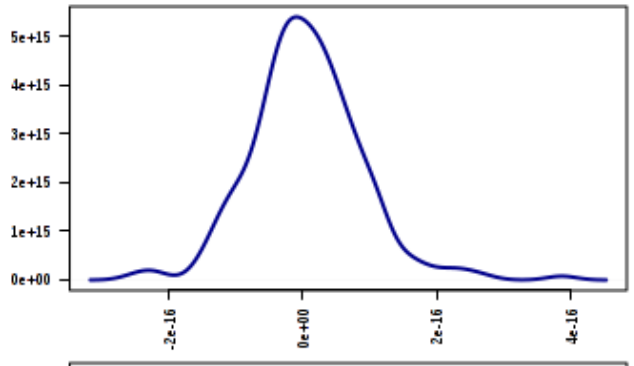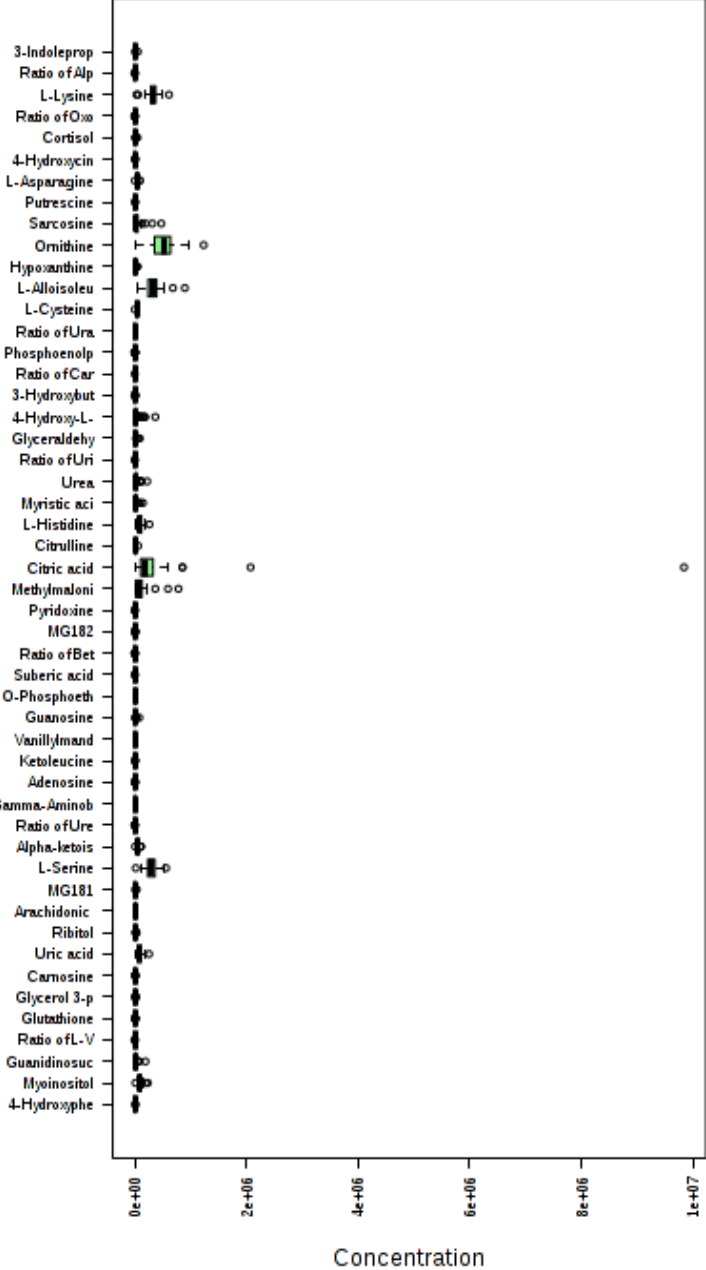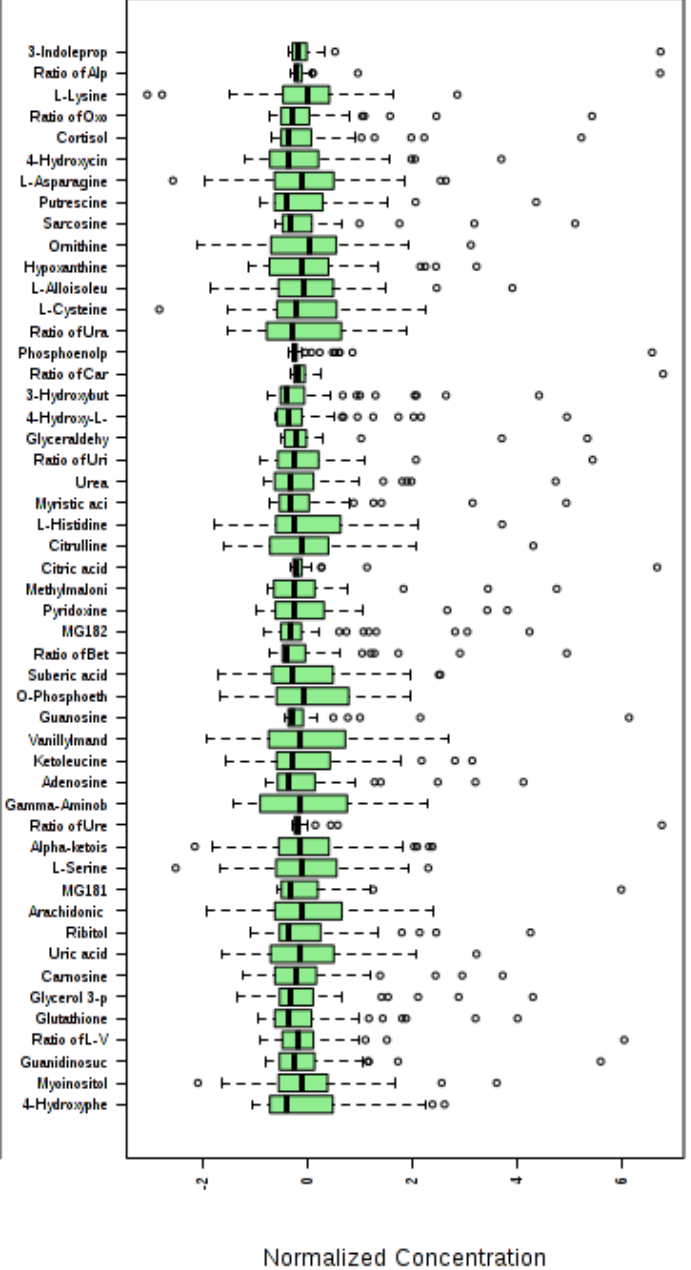

Concentration

Normalized Concentration

Supplementary Figure2: Heatmap showing metabolites classes in young CAP as compare to control.

A.

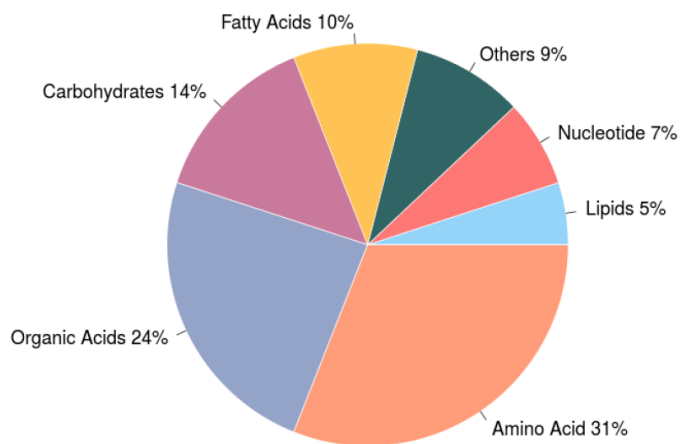

B.

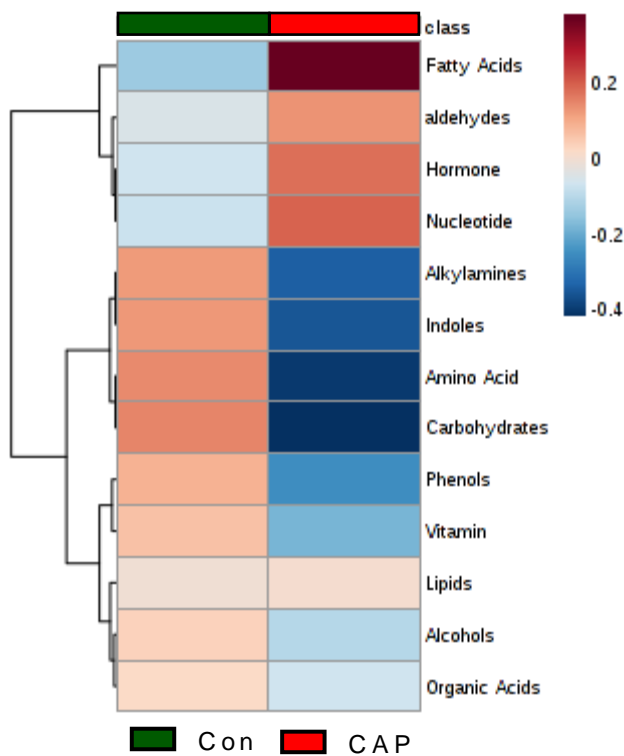

Supplement: 41598_2020_61290_MOESM1_ESM.pdf [file 41598_2020_61290_MOESM1_ESM.pdf]
